# Supplementary material for: Balancing welfare and habitat damage in pigs (Sus scrofa) under extensive farming: an ethological approach for determining the effects of group composition and environmental enrichment
Source: Frontiers journal article supplement (doi:10.3389/fetho.2024.1450585), 2024-09-20
Supplement: Table_1.docx [file Table_1.docx]

**Supplementary Table S1.** **Frequencies (mean ± s.d.) of the behaviours considered in the comparison between groups**.

| **All-female group (n = 10)** | **All-Male group (n = 13)** | **Mixed-Sex group (n= 12)** |
| --- | --- | --- |
| **Anxiety-Related behaviours (mean ± s.d.)** | | |
| Scratching: 3.10 ± 3.90  Head shaking: 6.40 ± 4.43  Rubbing: 5.40 ± 3.87  Yawning: 1.40 ± 2.01  Vacuum Chewing: 0.40 ± 0.84 | Scratching: 3.38 ± 2.36  Head shaking: 7.92 ± 8.01  Rubbing: 5.23 ± 4.15  Yawning: 1.62 ± 1.39  Vacuum Chewing: 0.23 ± 0.44 | Scratching: 4.83 ± 3.51  Head shaking: 6.08 ± 3.26  Rubbing: 1.50 ± 1.44  Yawning: 0.75 ± 1.22  Vacuum Chewing: 0.08 ± 0.29 |
| **Aggression (normalized on the number of group members; mean ± s.d.)** | | |
| Aggression: 0.389 ± 0.283 | Aggression: 0.506 ± 0.185 | Aggression: 0.416 ± 0.275 |
| **Affinitive behaviours (normalized on the number of group members; mean ± s.d.)** | | |
| Rest in contact: 0.567 ± 0.303  Nose contact: 0.522 ± 0.385  Head over: 0.189 ± 0.159  Grooming: 0.067 ± 0.150 | Rest in contact: 0.712 ± 0.336  Nose contact: 1.442 ± 0.669  Head over: 0.160 ± 0.099  Grooming: 0.006 ± 0.023 | Rest in contact: 1.083 ± 0.594  Nose contact: 1.167 ± 0.290  Head over: 0.220 ± 0.162  Grooming: 0.008 ± 0.026 |
| **Post-Conflict affinitive behaviours (normalized on the total number of aggression occurred in the group; mean ± s.d.)** | | |
| Rest in contact: 0.003 ± 0.009  Nose contact: 0.014 ± 0.028  Head over: 0.009 ± 0.014  Grooming: NA* | Rest in contact: 0.006 ± 0.007  Nose contact: 0.006 ± 0.008  Head over: 0.003 ± 0.008  Grooming: NA* | Rest in contact: 0.012 ± 0.009  Nose contact: 0.032 ± 0.027  Head over: 0.003 ± 0.010  Grooming: 0.001 ± 0.005 |
| **Excavation behaviours (mean ± s.d.)** | | |
| Rooting: 4.00 ± 3.80  Rasping: 0.90 ± 1.29  Pawing: NA* | Rooting: 5.69 ± 2.81  Rasping: 3.62 ± 1.80  Pawing: 0.08 ± 0.28 | Rooting: 8.17 ± 4.06  Rasping: 5.92 ± 3.00  Pawing: 0.17 ± 0.39 |
| **Exploration behaviours (mean ± s.d.)** | | |
| Foraging: 20.80 ± 2.70  Browsing/Grazing: 0.60 ± 1.07 | Foraging: 20.77 ± 2.95  Browsing/Grazing: 0.92 ± 1.04 | Foraging: 18.42 ± 1.08  Browsing/Grazing: 0.92 ± 0.90 |

Table showing means and standard deviation for each behaviour considered in different categories. NA*: Not Applicable, The behaviour was never observed during data collection with respect to the group indicated.
